# Supplementary material for: Bright Fluorescence Monitoring System Utilizing Zoanthus sp. Green Fluorescent Protein (ZsGreen) for Human G-Protein-Coupled Receptor Signaling in Microbial Yeast Cells
Source: PubMed Central journal article supplement (PMC3855394; doi:10.1371/journal.pone.0082237), 2013-12-05
Supplement: pone.0082237.s003.pdf [file pone.0082237.s003.pdf]

**PLoS ONE**  
**Supporting Information:**

**Bright fluorescence monitoring system utilizing *Zoanthus* sp. green fluorescent protein (*ZsGreen*) for human G-protein-coupled receptor signaling in microbial yeast cells**

**Table S1. List of oligonucleotides.**

| <b>o#</b> | <b>Name</b>        | <b>Sequence</b>                                                              |
|-----------|--------------------|------------------------------------------------------------------------------|
| o1        | NheI_ZsGreen_fw    | 5'-TTTTGCTAGCATGGCTCAGTCAAAGCACGG                                            |
| o2        | EcoRI_ZsGreen_rv   | 5'-TTTTGAATTCTCAGGGCAATGCAGATCCGG                                            |
| o3        | SacII_dFIG1up_fw   | 5'-GGGGCCGCGGTACAAAATTATAACATTTT                                             |
| o4        | XbaI_dFIG1up_rv    | 5'-CCCCTCTAGATTTTTTTTTTTTTTTTTTGT                                            |
| o5        | XbaI_URA3_fw       | 5'-CCCCTCTAGATTTTTTGTCTTTTTTTTGA                                             |
| o6        | EcoRI_hr40-URA3_rv | 5'-CCCCGAATCTTTTTTTTTTTTTTTTTTGT<br>ATAACTGATATAATT                          |
| o7        | EcoRI_ZsGreen_fw   | 5'-TTTTGAATTCATGGCTCAGTCAAAGCACGG                                            |
| o8        | XhoI_ZsGreen_rv    | 5'-TTTTCTCGAGTCAGGGCAATGCAGATCCGG                                            |
| o9        | XhoI_dFIG1dn_fw    | 5'-GGGGCTCGAGTTTTATCCTCAAATAAACAT                                            |
| o10       | KpnI_dFIG1dn_rv    | 5'-CCCCGGTACCAACAGACGGTAATGATTAGA                                            |
| o11       | SacII_dHIS3dn_fw   | 5'-AAAACCGCGGTATGAAATGCTTTTCTTGTT                                            |
| o12       | XbaI_dHIS3dn_rv    | 5'-GGGGTCTAGATGACACCGATTATTTAAAGC                                            |
| o13       | BamHI_hr40-URA3_rv | 5'-CCCCGGATCCTGACACCGATTATTTAAAGCTGCAGCATACGATATATATAGGGT<br>ATAACTGATATAATT |
| o14       | BamHI_PFIG1_fw     | 5'-AAAAGGATCCATCACCTGCATTGCCTCTT                                             |
| o15       | EcoRI_PFIG1_rv     | 5'-CCCCGAATCTTTTTTTTTTTTTTTTTTGT<br>TTTTGTTTGT                               |
| o16       | Clal_ZsGreen_rv    | 5'-TTTTATCGATTTCAGGGCAATGCAGATCCGG                                           |
| o17       | Clal_TFIG1_fw      | 5'-GGGGATCGATTTTTATCCTCAAATAAACAT                                            |
| o18       | Sall_TFIG1_rv      | 5'-CCCCGTCGACATAACATTAGTATTTATAAA                                            |
| o19       | Sall_dHIS3up_fw    | 5'-AAAAGTCGACCTTGCCTTCGTTTATCTTG                                             |
| o20       | KpnI_dHIS3up_rv    | 5'-AAAAGGTACCTCTTGGCCTCCTCTAGTACA                                            |
| o21       | NheI_SSTR2_fw      | 5'-TTTTGCTAGCATGGACATGGCGGATGAGCC                                            |
| o22       | BglII_SSTR2_rv     | 5'-CCCCAGATCTTCAGATACTGTTTGGAGGT                                             |
| o23       | NheI_NTSR1_fw      | 5'-AAAAGCTAGCATGCGCCTCAACAGCTCCGC                                            |
| o24       | BglII_NTSR1_rv     | 5'-CCCCAGATCTCTAGTACAGCGTCTCGCGGG                                            |
| o25       | NheI_SS_fw         | 5'-GGGGGCTAGCATGAGATTCCTTCAATTTT                                             |
| o26       | NTS_SS_rv          | 5'-ATTCTCATACAGCTGTCTTTTATCCAAAGA                                            |
| o27       | Sall_NTS_rv        | 5'-AAAAGTCGACGAGTATGTAGGGTCTTCTGGGTTTATTCTCATACAGCTG                         |
| o28       | Sall_NTS(8-13)_rv  | 5'-GGGGGTCGACGAGTATGTAGGGTCTTCTTTTATCCAAAGATACCC                             |
| o29       | Sall_NMN_rv        | 5'-GGGGGTCGACCAGAATATAAGGAATTTTCTTTTATCCAAAGATACCC                           |
